# Supplementary material for: Highly luminescent nitrogen-doped carbon quantum dots as effective fluorescent probes for mercuric and iodide ions
Source: Royal Society of Chemistry journal article supplement (doi:10.1039/c4tc02756f), 2014-12-30
Supplement: c4tc02756f1.pdf [file c4tc02756f1.pdf]

## Electronic Supplementary Information

### Highly luminescent nitrogen-doped carbon quantum dots as effective fluorescent probes for mercuric and iodide ions

Zi Li<sup>a,b,†</sup> Huijun Yu,<sup>b,c,†</sup> Tong Bian,<sup>b</sup> Yufei Zhao,<sup>b</sup> Chao Zhou,<sup>b</sup> Lu Shang,<sup>b</sup> Yanhui Liu,<sup>a</sup> Li-Zhu Wu,<sup>b</sup> Chen-Ho Tung<sup>b</sup> and Tierui Zhang<sup>\*b</sup>

<sup>a</sup>Beijing Key Laboratory of Bioprocess, College of Biology Science and Technology, Beijing University of Chemical Technology, Beijing, 100029, P. R. China.

<sup>b</sup>Key Laboratory of Photochemical Conversion and Optoelectronic Materials, Technical Institute of Physics and Chemistry, Chinese Academy of Sciences, Beijing, 100190, P. R. China.

<sup>c</sup>University of Chinese Academy of Sciences, Beijing, 100049, P. R. China

\*Corresponding author. E-mail: tierui@mail.ipc.ac.cn

<sup>†</sup>They make equal contributions to this study.

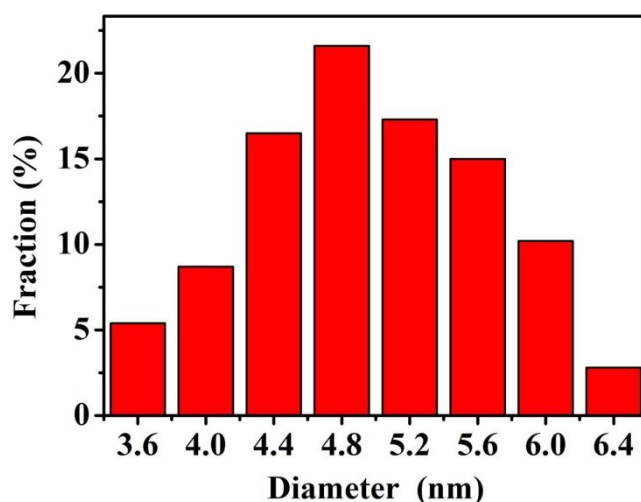

**Fig. S1** The size distribution of N-CQDs.

**Table S1.** Elemental analysis of N-CQDs

|        | C (%) | H (%) | N (%) | O (%) | Composition                                                         |
|--------|-------|-------|-------|-------|---------------------------------------------------------------------|
| N-CQDs | 47.8  | 8.0   | 19.0  | 25.2  | C <sub>4.0</sub> H <sub>8.0</sub> O <sub>1.6</sub> N <sub>1.4</sub> |

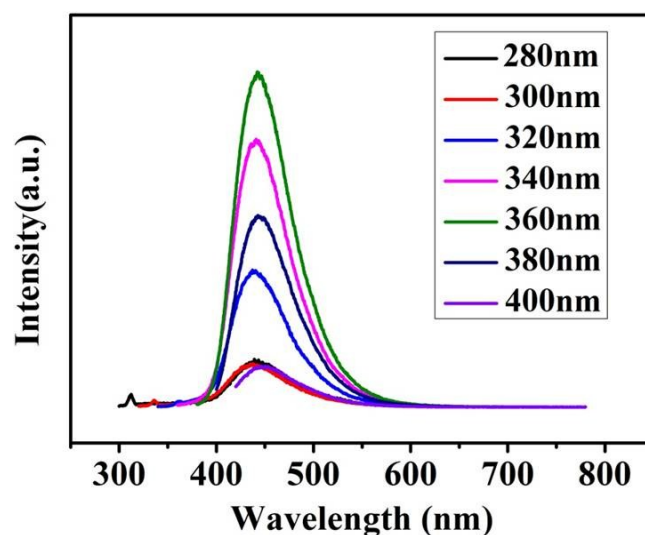

**Fig. S2** Fluorescence spectra of N-CQDs. (The strongest emission was observed at 445 nm excited at 360 nm.)

### QY measurements

The QY ( $\Phi$ ) of N-CQDs was determined with quinine sulfate (QY = 54% in 0.1 M  $\text{H}_2\text{SO}_4$ ) as the reference.

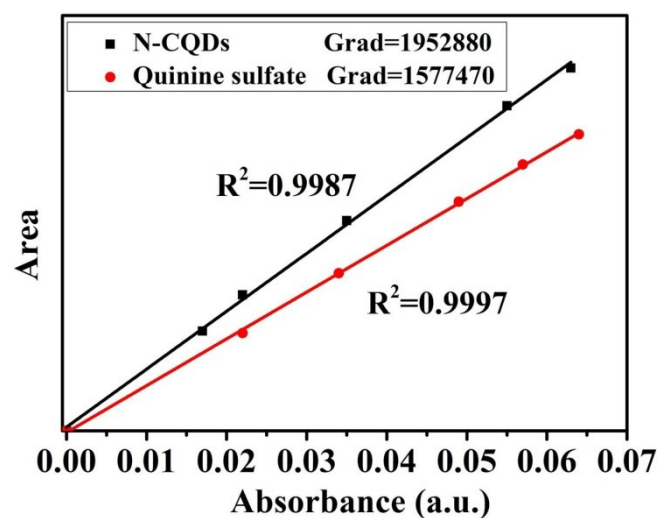

**Fig. S3** The relationship between the fluorescence intensity and the absorbance of Quinine sulfate (red) and N-CQDs (black). The QY of N-CQDs was calculated to be 66.8%.

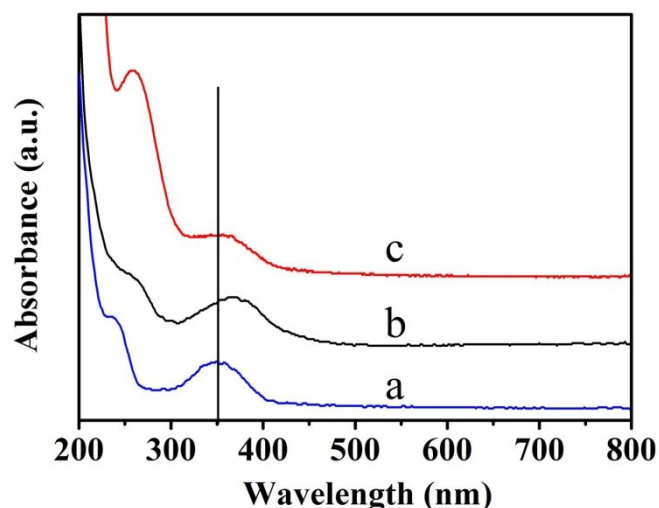

**Fig. S4** UV-Vis absorption spectra of N-CQDs (a), N-CQDs-Hg<sup>2+</sup> (b), and N-CQDs-Hg<sup>2+</sup>-I<sup>-</sup> (c).

#### Fluorescence lifetime measurements

Fluorescence lifetimes were measured by the time-correlated single-photon counting technique. Measurements were carried out at  $\lambda_{\text{ex}} = 340$  nm and  $\lambda_{\text{em}} = 445$  nm. The fluorescence decay curves of N-CQDs were fitted with double exponential functions.

**Table S2** Fluorescence lifetimes of N-CQDs, N-CQDs in the presence of Hg<sup>2+</sup>, and N-CQDs-Hg<sup>2+</sup> in the presence of I<sup>-</sup>.

| system                                  | 1                |                |                   | 2                |                |                   | $\tau_{\text{avg}}$<br>(ns) |
|-----------------------------------------|------------------|----------------|-------------------|------------------|----------------|-------------------|-----------------------------|
|                                         | $\tau_1$<br>(ns) | A <sub>1</sub> | Percentage<br>(%) | $\tau_2$<br>(ns) | A <sub>2</sub> | Percentage<br>(%) |                             |
| N-CQDs                                  | 2.91             | 0.02858        | 4.08              | 15.30            | 0.1280         | 95.92             | 14.79                       |
| N-CQDs-Hg <sup>2+</sup>                 | 3.03             | 0.07432        | 18.69             | 10.10            | 0.0972         | 81.31             | 8.77                        |
| N-CQDs-Hg <sup>2+</sup> -I <sup>-</sup> | 1.17             | 0.04800        | 2.87              | 14.80            | 0.1278         | 97.13             | 14.43                       |

$\tau_1$  and  $\tau_2$  refer to the short and long lifetime of N-CQDs, respectively.
